# Supplementary material
Source: PubMed Central journal article supplement (PMC2823301)

## Supplemental Data

**Supplementary figure S1 (a)** Serum FSH and **(b)** serum FSH/LH ratio values in full study group (n=1,029) grouped according to their *FSHB* promoter SNP rs10835638 genotype (GG, n=746; GT, n=258, TT, n=25). The extreme outlier values (above +2.5SD from the total mean) were excluded from the figure. The boxes represent the 25<sup>th</sup> and 75<sup>th</sup> percentiles; whiskers are lines extending from each end of the box covering the extent of the data on 1.5 X interquartile range. The median value is denoted as the line that bisects the boxes. Circles represent the outlier values. For each boxplot are shown *P*-values of one-way analysis of covariance (ANCOVA). The F-ratio represents between-groups variance divided by within-groups variance.

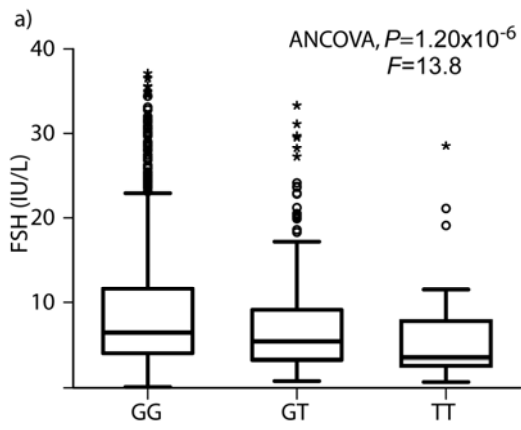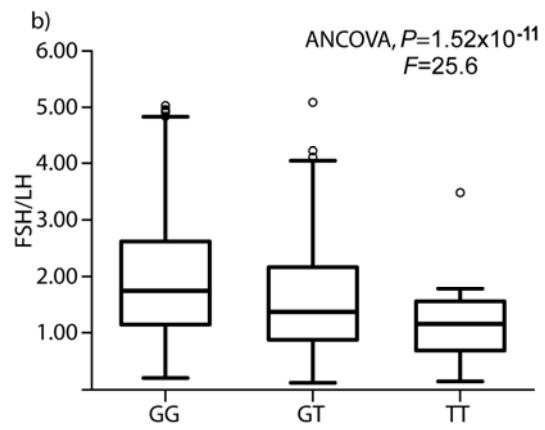

Supplement: jc.2009-1010_1.pdf [file jc.2009-1010_1.pdf]
